# Supplementary material
Source: HighWire-hosted journal article supplement (http://pharmrev.aspetjournals.org/highwire/filestream/24592/field_highwire_adjunct_files/0/787_supp_tables.pdf)
Supplement: 787_supp_tables.pdf [file 787_supp_tables.pdf]

Pharmacological Reviews

MS#: PHARMREV-AR-2022-000787R1

# Nonhormonal male contraceptive development- Strategies for Progress

Logan Nickels<sup>1</sup> and Wei Yan<sup>2, 3,\*</sup>

<sup>1</sup>Male Contraceptive Initiative, Durham, NC 27705, USA

<sup>2</sup>The Lundquist Institute for Biomedical Innovation at Harbor-UCLA Medical Center, Torrance, CA 90502, USA.

<sup>3</sup>Department of Medicine, David Geffen School of Medicine at UCLA, Los Angeles, CA 90095, USA.

\*Correspondence:

Logan Nickels, Male Contraceptive Initiative, Durham, NC 27705, USA. Email: [Logan@malecontraceptive.org](mailto:Logan@malecontraceptive.org); Wei Yan,

The Lundquist Institute for Biomedical Innovation at Harbor-UCLA Medical Center, Torrance, CA 90502, USA. Email:

[wei.yan@lundquist.org](mailto:wei.yan@lundquist.org)

**Supplemental Table 1. Percentage of men who will take up a male contraceptive method.**

|                 | Kenya | Nigeria | CDI | Vietnam | Bangladesh | US     |
|-----------------|-------|---------|-----|---------|------------|--------|
| 1-year          | 53    | 76      | 62  | 70      | 76         | 39-49% |
| Ever-use male   | 84    | 95      | 79  | 98      | 95         | 78     |
| Ever-use female | 84    | 86      | 74  | 98      | 86         | N/A*   |

\*Female partner data was not fielded in the United States.
